# Supplementary material
Source: publisher figshare collection journal article supplement (https://asha.figshare.com/ndownloader/files/27918246)
Supplement: Supplementary file 1 [file 27918246]

## **Supplemental Material S1. Survey of SLP clinicians and VSD researchers.**

---

### **(Section completed only by SLPs)**

1. How long have you been a practicing SLP?
  - a. Less than one year
  - b. 1 - 2 years
  - c. 3 - 5 years
  - d. 6 - 10 years
  - e. 11 - 15 years
  - f. 16 - 20 years
  - g. More than 20 years
2. What is your highest level of education?
  - a. Master's degree
  - b. Clinical Doctorate (SLPD)
  - c. Doctoral degree (Ph.D.)
3. Where did you get your Master's degree?
4. Did your Master's degree program include a dedicated class in AAC?
  - a. Yes, a mandatory course
  - b. Yes, an elective course that I took
  - c. Yes, an elective course that I did not take
  - d. No dedicated course was offered
5. Where did you get your Clinical Doctorate? (when clinical doctorate option selected)
6. Did your Clinical Doctoral program include coursework in AAC? (when clinical doctorate option selected)
  - a. Yes
  - b. No
7. Where did you get your Doctorate (PhD)? (when PhD option selected)
8. Did your Doctoral program include coursework in AAC? (when PhD option selected)
  - a. Yes
  - b. No
9. How likely are you to pursue Continuing Education credits in AAC topics?

Not likely at all



Very likely
10. In what setting do you currently work?
  - a. Schools
  - b. Residential healthcare
  - c. Non-residential healthcare
  - d. Hospital
  - e. Private Practice
  - f. Other \_\_\_\_\_
11. What population makes up the majority of your current caseload?
  - a. Child (0-21 years)
  - b. Adults (over 21 years old)

## Supplemental Material S1. Survey of SLP clinicians and VSD researchers.

12. Please rate your level of interest in AAC.

- a. Not at all interested
- b. Slightly interested
- c. Somewhat interested
- d. Moderately interested
- e. Extremely interested

13. Have you ever used a visual scene display (VSD) with a client?

- a. Yes
- b. No
- c. I don't know what a visual scene display is.

(Section completed by child-based SLPs and VSD Researchers)

Please rate the level of effectiveness with which visual scene displays support the following communication functions for children who use AAC.

|                                            |                      |                                                                                      |                |
|--------------------------------------------|----------------------|--------------------------------------------------------------------------------------|----------------|
| 14. Requesting                             | Not at all effective |    | Very effective |
| 15. Protesting                             | Not at all effective |    | Very effective |
| 16. Commenting                             | Not at all effective |    | Very effective |
| 17. Greeting                               | Not at all effective |   | Very effective |
| 18. Social interactions                    | Not at all effective |  | Very effective |
| 19. Spontaneous novel utterance generation | Not at all effective |  | Very effective |

Please rate how effectively visual scene displays support the communication of children at the following communication levels.

20. For emerging communicators who are not yet using symbolic language, visual scene displays are:

Not at all effective  Extremely effective

21. For context dependent communicators who have reliable symbolic language in limited contexts and with limited partners, visual scene displays are:

Not at all effective  Extremely effective

22. For independent communicators who can communicate about a range of topics across a range of contexts and partners, visual scene displays are:

Not at all effective  Extremely effective

Please rate your opinions on the following statements about visual scene displays for children who use AAC.

23. Visual scene displays can represent basic concepts.

Strongly disagree  Strongly agree

## Supplemental Material S1. Survey of SLP clinicians and VSD researchers.

24. Visual scene displays can represent complex concepts.  
 Strongly disagree  Strongly agree
25. Visual scene displays can support communication in a variety of situations and contexts.  
 Strongly disagree  Strongly agree
26. The use of visual scene displays can result in rich communication experiences for children who rely on AAC and their communication partners.  
 Strongly disagree  Strongly agree
27. Communication partners can use visual scene displays to support the child's comprehension.  
 Strongly disagree  Strongly agree

(Section completed only by adult-based SLPs and VSD Researchers)

Please rate the level of effectiveness with which visual scene displays support the following communicative functions for adults who use AAC.

28. Expressing social etiquette messages.  
 Not at all effective  Very effective
29. Sharing personal stories.  
 Not at all effective  Very effective
30. Sharing current events and information.  
 Not at all effective  Very effective
31. Transactional communication (e.g., ordering coffee).  
 Not at all effective  Very effective
32. Expressing wants and needs.  
 Not at all effective  Very effective
33. Building social closeness.  
 Not at all effective  Very effective

Please rate your opinions on the following statements about visual scene displays for adults who use AAC.

34. Visual scene displays reduce navigational demands associated with other types of AAC displays (e.g., grids).  
 Strongly disagree  Strongly agree
35. Visual scene displays can represent basic concepts.  
 Strongly disagree  Strongly agree
36. Visual scene displays can represent complex concepts.  
 Strongly disagree  Strongly agree
37. Visual scene displays can support communication in a variety of situations and contexts.  
 Strongly disagree  Strongly agree

**Supplemental Material S1.** Survey of SLP clinicians and VSD researchers.

---

38. The use of visual scene displays can result in rich communication experiences for adults who rely on AAC and their communication partners.

Strongly disagree  Strongly agree

39. Communication partners can use visual scene displays to support the language comprehension of adults who rely on AAC.

Strongly disagree  Strongly agree

40. Visual scene displays can be used to support a communication partner's comprehension during interactions.

Strongly disagree  Strongly agree

41. Visual scene displays can be used to support memory of life events.

Strongly disagree  Strongly agree
